# Supplementary material for: Heavy-element–ligand covalence: ligand noninnocence in molybdenum and tungsten Viking-helmet Corroles
Source: Royal Society of Chemistry journal article supplement (doi:10.1039/d1dt01970h), 2021-01-01
Supplement: d1dt01970h1.pdf [file d1dt01970h1.pdf]

## Supporting Information

# Heavy-Element–Ligand Covalence: Ligand Noninnocence in Molybdenum and Tungsten Viking-Helmet Corroles

Hugo Vazquez-Lima,<sup>a,b</sup> Jeanet Conradie,<sup>a,c</sup> Martin A. L. Johansen, Stian Rølvaag Martinsen,<sup>a</sup>  
Abraham B. Alemayehu\*<sup>a</sup> and Abhik Ghosh\*<sup>a</sup>

<sup>a</sup>Department of Chemistry, UiT – The Arctic University of Norway, N-9037 Tromsø, Norway; Email: [abraham.alemayehu@uit.no](mailto:abraham.alemayehu@uit.no) (ABA); [abhik.ghosh@uit.no](mailto:abhik.ghosh@uit.no) (AG); <sup>b</sup>Centro de Química, Instituto de Ciencias, Universidad Autónoma de Puebla, Edif. IC9, CU, San Manuel, 72570 Puebla, Puebla, Mexico; <sup>c</sup>Department of Chemistry, University of the Free State, P.O. Box 339, Bloemfontein, 9300, South Africa.

Scalar-relativistic B3LYP/ZORA-STO-TZP coordinates (Å)

1. Mo[TPC]Cl<sub>2</sub>

|    |              |              |              |
|----|--------------|--------------|--------------|
| Mo | -0.023226000 | -0.010547000 | -0.081087000 |
| Cl | -0.004844000 | 1.525556000  | 1.728314000  |
| Cl | -0.035438000 | -1.566939000 | 1.711816000  |
| C  | -2.673107000 | 0.704196000  | -1.202197000 |
| C  | -3.553300000 | 1.774296000  | -1.490833000 |
| C  | -2.809352000 | 2.931371000  | -1.446735000 |
| C  | -1.462340000 | 2.577854000  | -1.139313000 |
| C  | -0.298837000 | 3.334188000  | -1.176511000 |
| C  | 0.974904000  | 2.740332000  | -1.123546000 |
| C  | 2.221078000  | 3.426046000  | -1.224814000 |
| C  | 3.217957000  | 2.498654000  | -1.191785000 |
| C  | 2.609059000  | 1.217583000  | -1.072065000 |
| C  | 3.262852000  | -0.013304000 | -1.065751000 |
| C  | 2.604271000  | -1.242042000 | -1.071777000 |
| C  | 3.206752000  | -2.523298000 | -1.214986000 |
| C  | 2.205425000  | -3.445703000 | -1.261611000 |
| C  | 0.962630000  | -2.755914000 | -1.150713000 |
| C  | -0.314635000 | -3.340592000 | -1.221689000 |
| C  | -1.473659000 | -2.577781000 | -1.178123000 |
| C  | -2.822033000 | -2.920703000 | -1.491754000 |
| C  | -3.560931000 | -1.759994000 | -1.517999000 |
| C  | -2.675876000 | -0.698351000 | -1.212939000 |
| C  | -1.088375000 | 6.965846000  | -0.495634000 |
| C  | -1.136450000 | -6.979339000 | -0.617752000 |
| C  | -0.968479000 | 5.590673000  | -0.339240000 |
| C  | -1.006992000 | -5.608426000 | -0.432737000 |
| C  | -0.659435000 | 7.576219000  | -1.667514000 |
| C  | -0.703663000 | -7.569314000 | -1.798660000 |
| C  | -0.412174000 | 4.807942000  | -1.352890000 |
| C  | -0.436954000 | -4.809828000 | -1.426145000 |
| C  | -0.109346000 | 6.804581000  | -2.684172000 |
| C  | -0.140973000 | -6.781469000 | -2.795645000 |
| C  | 7.550607000  | -0.014596000 | -1.154573000 |
| C  | 6.831871000  | 0.171808000  | -2.329278000 |
| C  | 6.874315000  | -0.204633000 | 0.043993000  |
| C  | 5.484995000  | -0.207252000 | 0.068966000  |
| C  | 5.442329000  | 0.171457000  | -2.304704000 |
| C  | 4.756408000  | -0.016948000 | -1.105244000 |
| C  | -0.006665000 | -5.411981000 | -2.610440000 |
| C  | 0.015177000  | 5.430599000  | -2.527644000 |
| N  | 1.227299000  | 1.379640000  | -1.004907000 |
| N  | 1.222029000  | -1.398873000 | -1.008547000 |
| N  | -1.431955000 | -1.211144000 | -0.973549000 |
| N  | -1.427197000 | 1.208314000  | -0.954320000 |
| H  | 0.220054000  | 7.271803000  | -3.602922000 |
| H  | 0.190930000  | -7.232469000 | -3.721643000 |
| H  | 0.437429000  | 4.832368000  | -3.324125000 |
| H  | 0.424551000  | -4.801085000 | -3.392279000 |

|   |              |              |              |
|---|--------------|--------------|--------------|
| H | 2.327412000  | 4.492243000  | -1.320293000 |
| H | 2.306801000  | -4.510351000 | -1.377911000 |
| H | 4.277595000  | 2.672263000  | -1.257003000 |
| H | 4.265451000  | -2.699755000 | -1.291056000 |
| H | 4.959766000  | -0.352884000 | 1.003628000  |
| H | 4.884232000  | 0.316047000  | -3.220419000 |
| H | 7.352129000  | 0.316973000  | -3.266831000 |
| H | 7.426994000  | -0.349301000 | 0.962846000  |
| H | 8.632453000  | -0.013042000 | -1.173290000 |
| H | -0.805409000 | -8.636887000 | -1.942417000 |
| H | -0.753755000 | 8.647286000  | -1.788746000 |
| H | -1.336285000 | -5.150627000 | 0.490235000  |
| H | -1.293991000 | 5.116830000  | 0.576992000  |
| H | -1.572870000 | -7.586372000 | 0.164489000  |
| H | -1.513901000 | 7.560300000  | 0.302127000  |
| H | -3.169335000 | -3.914535000 | -1.716248000 |
| H | -3.152324000 | 3.929986000  | -1.656127000 |
| H | -4.599192000 | 1.683837000  | -1.732711000 |
| H | -4.606428000 | -1.661216000 | -1.758314000 |

## 2. Mo[TPC] (O)

|    |              |              |              |
|----|--------------|--------------|--------------|
| Mo | 0.016796000  | -0.002462000 | -0.221183000 |
| O  | 0.101075000  | 0.004495000  | 1.461906000  |
| C  | -2.687891000 | 0.706923000  | -1.172786000 |
| C  | -3.564882000 | 1.769096000  | -1.476439000 |
| C  | -2.818982000 | 2.934806000  | -1.461392000 |
| C  | -1.469466000 | 2.596603000  | -1.154176000 |
| C  | -0.291251000 | 3.365526000  | -1.184291000 |
| C  | 0.986331000  | 2.786800000  | -1.128205000 |
| C  | 2.244051000  | 3.458966000  | -1.197602000 |
| C  | 3.237927000  | 2.523619000  | -1.173015000 |
| C  | 2.631834000  | 1.234819000  | -1.084050000 |
| C  | 3.279049000  | -0.010973000 | -1.080571000 |
| C  | 2.628735000  | -1.255189000 | -1.079606000 |
| C  | 3.229022000  | -2.542442000 | -1.218082000 |
| C  | 2.232085000  | -3.474518000 | -1.241990000 |
| C  | 0.978177000  | -2.800404000 | -1.132971000 |
| C  | -0.302411000 | -3.372047000 | -1.192552000 |
| C  | -1.477384000 | -2.598994000 | -1.153105000 |
| C  | -2.828391000 | -2.932943000 | -1.458697000 |
| C  | -3.570857000 | -1.765241000 | -1.472428000 |
| C  | -2.690161000 | -0.705606000 | -1.170345000 |
| C  | -1.209816000 | 6.975743000  | -0.523800000 |
| C  | -1.240814000 | -6.989015000 | -0.595690000 |
| C  | -1.080961000 | 5.600450000  | -0.380417000 |
| C  | -1.096185000 | -5.618585000 | -0.423137000 |
| C  | -0.682731000 | 7.614953000  | -1.639194000 |
| C  | -0.733842000 | -7.607916000 | -1.731584000 |
| C  | -0.417601000 | 4.839283000  | -1.346862000 |
| C  | -0.437991000 | -4.842450000 | -1.381147000 |
| C  | -0.028312000 | 6.868536000  | -2.611727000 |

|   |              |              |              |
|---|--------------|--------------|--------------|
| C | -0.083492000 | -6.846400000 | -2.694984000 |
| C | 7.573600000  | -0.020346000 | -1.196217000 |
| C | 6.847273000  | 0.340775000  | -2.324448000 |
| C | 6.902842000  | -0.381055000 | -0.034135000 |
| C | 5.513843000  | -0.378794000 | -0.000300000 |
| C | 5.458222000  | 0.342494000  | -2.289665000 |
| C | 4.773570000  | -0.015774000 | -1.126852000 |
| C | 0.063033000  | -5.476348000 | -2.521470000 |
| C | 0.103324000  | 5.493540000  | -2.466693000 |
| N | 1.256113000  | 1.419065000  | -1.029099000 |
| N | 1.254344000  | -1.437034000 | -1.005756000 |
| N | -1.442019000 | -1.242103000 | -0.943883000 |
| N | -1.438502000 | 1.239763000  | -0.946816000 |
| H | 0.375894000  | 7.355848000  | -3.489429000 |
| H | 0.305682000  | -7.317884000 | -3.587965000 |
| H | 0.602026000  | 4.916328000  | -3.233709000 |
| H | 0.557162000  | -4.887007000 | -3.282146000 |
| H | 2.366713000  | 4.525813000  | -1.265502000 |
| H | 2.349324000  | -4.539115000 | -1.344848000 |
| H | 4.297712000  | 2.704283000  | -1.216805000 |
| H | 4.286460000  | -2.722327000 | -1.304038000 |
| H | 4.994920000  | -0.653752000 | 0.908523000  |
| H | 4.896234000  | 0.618911000  | -3.172106000 |
| H | 7.361800000  | 0.618630000  | -3.235074000 |
| H | 7.460277000  | -0.660901000 | 0.850244000  |
| H | 8.655355000  | -0.020820000 | -1.222481000 |
| H | -0.846840000 | -8.675512000 | -1.866665000 |
| H | -0.783105000 | 8.686486000  | -1.751186000 |
| H | -1.485481000 | -5.142502000 | 0.466899000  |
| H | -1.485629000 | 5.108744000  | 0.494087000  |
| H | -1.746998000 | -7.573852000 | 0.161061000  |
| H | -1.719230000 | 7.548497000  | 0.240072000  |
| H | -3.186449000 | -3.923066000 | -1.684040000 |
| H | -3.174081000 | 3.926078000  | -1.686366000 |
| H | -4.611987000 | 1.678614000  | -1.713719000 |
| H | -4.617726000 | -1.671437000 | -1.709404000 |

### 3. W[TPC]Cl<sub>2</sub>

|    |              |              |              |
|----|--------------|--------------|--------------|
| W  | -0.027106000 | -0.013883000 | -0.064810000 |
| Cl | -0.004368000 | 1.505803000  | 1.756734000  |
| Cl | -0.033881000 | -1.561737000 | 1.733468000  |
| C  | -2.683032000 | 0.704184000  | -1.175844000 |
| C  | -3.556846000 | 1.773806000  | -1.468685000 |
| C  | -2.808329000 | 2.930553000  | -1.431004000 |
| C  | -1.465074000 | 2.577577000  | -1.119310000 |
| C  | -0.299046000 | 3.333824000  | -1.158264000 |
| C  | 0.969904000  | 2.740347000  | -1.099945000 |
| C  | 2.216323000  | 3.421306000  | -1.207526000 |
| C  | 3.213093000  | 2.493693000  | -1.175318000 |
| C  | 2.607032000  | 1.212939000  | -1.051363000 |

|   |              |              |              |
|---|--------------|--------------|--------------|
| C | 3.262523000  | -0.015770000 | -1.052646000 |
| C | 2.601173000  | -1.241528000 | -1.064167000 |
| C | 3.198693000  | -2.522085000 | -1.221512000 |
| C | 2.196428000  | -3.443372000 | -1.268384000 |
| C | 0.954425000  | -2.758118000 | -1.141435000 |
| C | -0.318512000 | -3.341583000 | -1.215309000 |
| C | -1.479455000 | -2.577853000 | -1.168353000 |
| C | -2.824102000 | -2.916867000 | -1.489904000 |
| C | -3.565180000 | -1.755106000 | -1.509151000 |
| C | -2.686343000 | -0.696554000 | -1.191668000 |
| C | -1.068437000 | 6.979801000  | -0.523397000 |
| C | -1.114881000 | -6.991908000 | -0.639066000 |
| C | -0.954664000 | 5.606249000  | -0.347141000 |
| C | -0.990583000 | -5.621965000 | -0.441510000 |
| C | -0.646520000 | 7.570185000  | -1.708243000 |
| C | -0.693840000 | -7.567562000 | -1.831249000 |
| C | -0.409856000 | 4.805389000  | -1.352407000 |
| C | -0.439078000 | -4.809771000 | -1.433774000 |
| C | -0.110227000 | 6.780087000  | -2.717678000 |
| C | -0.149345000 | -6.766064000 | -2.827378000 |
| C | 7.551508000  | -0.005196000 | -1.148624000 |
| C | 6.830398000  | 0.155202000  | -2.325646000 |
| C | 6.877537000  | -0.173453000 | 0.054331000  |
| C | 5.488234000  | -0.179243000 | 0.081125000  |
| C | 5.440802000  | 0.147855000  | -2.299479000 |
| C | 4.756568000  | -0.017735000 | -1.095559000 |
| C | -0.022282000 | -5.397530000 | -2.630043000 |
| C | 0.009123000  | 5.408192000  | -2.540465000 |
| N | 1.223531000  | 1.373735000  | -0.972790000 |
| N | 1.216826000  | -1.396093000 | -0.986344000 |
| N | -1.437285000 | -1.212762000 | -0.950098000 |
| N | -1.430805000 | 1.208708000  | -0.925733000 |
| H | 0.213105000  | 7.231157000  | -3.646672000 |
| H | 0.172384000  | -7.205321000 | -3.762627000 |
| H | 0.420383000  | 4.795288000  | -3.331599000 |
| H | 0.394371000  | -4.775681000 | -3.411354000 |
| H | 2.323740000  | 4.486940000  | -1.308425000 |
| H | 2.297040000  | -4.506661000 | -1.397366000 |
| H | 4.272421000  | 2.667205000  | -1.245974000 |
| H | 4.256467000  | -2.698982000 | -1.308413000 |
| H | 4.964851000  | -0.307002000 | 1.019443000  |
| H | 4.881022000  | 0.271524000  | -3.217267000 |
| H | 7.348932000  | 0.284435000  | -3.266512000 |
| H | 7.431950000  | -0.297572000 | 0.975128000  |
| H | 8.633367000  | 0.000772000  | -1.168709000 |
| H | -0.791515000 | -8.634123000 | -1.984687000 |
| H | -0.736154000 | 8.639782000  | -1.845120000 |
| H | -1.311721000 | -5.175601000 | 0.489936000  |
| H | -1.275739000 | 5.148480000  | 0.578773000  |
| H | -1.538488000 | -7.609393000 | 0.142013000  |
| H | -1.484356000 | 7.588679000  | 0.268599000  |

|   |              |              |              |
|---|--------------|--------------|--------------|
| H | -3.170180000 | -3.908336000 | -1.726490000 |
| H | -3.149175000 | 3.928399000  | -1.647614000 |
| H | -4.602524000 | 1.686455000  | -1.712440000 |
| H | -4.609205000 | -1.656551000 | -1.755802000 |

#### 4. W[TPC] (O)

|   |              |              |              |
|---|--------------|--------------|--------------|
| W | 0.010169000  | -0.002556000 | -0.179361000 |
| O | 0.086854000  | 0.001101000  | 1.525679000  |
| C | -2.693111000 | 0.710079000  | -1.144592000 |
| C | -3.561887000 | 1.771921000  | -1.468519000 |
| C | -2.813727000 | 2.936734000  | -1.450228000 |
| C | -1.470468000 | 2.598170000  | -1.121329000 |
| C | -0.289537000 | 3.362895000  | -1.152771000 |
| C | 0.988365000  | 2.786224000  | -1.087980000 |
| C | 2.244068000  | 3.457314000  | -1.181865000 |
| C | 3.239641000  | 2.522927000  | -1.158517000 |
| C | 2.636958000  | 1.235377000  | -1.046113000 |
| C | 3.282902000  | -0.010365000 | -1.047506000 |
| C | 2.631829000  | -1.253623000 | -1.042753000 |
| C | 3.228384000  | -2.539664000 | -1.194142000 |
| C | 2.229535000  | -3.470147000 | -1.222276000 |
| C | 0.977535000  | -2.796708000 | -1.099719000 |
| C | -0.303522000 | -3.365803000 | -1.172553000 |
| C | -1.480549000 | -2.595902000 | -1.132595000 |
| C | -2.825109000 | -2.926837000 | -1.465348000 |
| C | -3.568289000 | -1.759054000 | -1.477716000 |
| C | -2.695626000 | -0.702691000 | -1.146865000 |
| C | -1.197662000 | 6.984992000  | -0.544392000 |
| C | -1.221143000 | -6.997472000 | -0.633044000 |
| C | -1.061023000 | 5.613348000  | -0.374754000 |
| C | -1.080240000 | -5.629738000 | -0.435986000 |
| C | -0.696900000 | 7.601540000  | -1.684338000 |
| C | -0.726976000 | -7.592145000 | -1.787250000 |
| C | -0.416514000 | 4.834627000  | -1.339533000 |
| C | -0.437484000 | -4.833460000 | -1.387232000 |
| C | -0.060034000 | 6.836976000  | -2.654452000 |
| C | -0.092675000 | -6.809531000 | -2.744423000 |
| C | 7.575263000  | -0.034860000 | -1.214463000 |
| C | 6.835872000  | 0.272022000  | -2.350129000 |
| C | 6.918535000  | -0.335089000 | -0.027407000 |
| C | 5.529913000  | -0.327680000 | 0.023456000  |
| C | 5.447273000  | 0.278751000  | -2.298374000 |
| C | 4.777127000  | -0.018564000 | -1.110708000 |
| C | 0.050801000  | -5.442794000 | -2.546190000 |
| C | 0.079120000  | 5.465848000  | -2.483415000 |
| N | 1.260194000  | 1.417830000  | -0.970543000 |
| N | 1.256025000  | -1.432674000 | -0.956648000 |
| N | -1.449298000 | -1.241086000 | -0.902220000 |
| N | -1.444775000 | 1.242396000  | -0.899246000 |
| H | 0.324539000  | 7.307080000  | -3.550106000 |

|   |              |              |              |
|---|--------------|--------------|--------------|
| H | 0.286340000  | -7.262060000 | -3.651555000 |
| H | 0.563779000  | 4.873668000  | -3.248081000 |
| H | 0.533602000  | -4.836572000 | -3.300990000 |
| H | 2.364700000  | 4.523128000  | -1.267822000 |
| H | 2.345093000  | -4.533690000 | -1.337780000 |
| H | 4.298525000  | 2.703839000  | -1.221404000 |
| H | 4.285076000  | -2.720792000 | -1.287852000 |
| H | 5.021420000  | -0.557478000 | 0.950557000  |
| H | 4.874622000  | 0.513929000  | -3.185976000 |
| H | 7.339580000  | 0.503863000  | -3.279568000 |
| H | 7.486592000  | -0.572044000 | 0.862610000  |
| H | 8.656631000  | -0.039751000 | -1.254268000 |
| H | -0.837008000 | -8.657519000 | -1.941119000 |
| H | -0.803882000 | 8.670063000  | -1.816999000 |
| H | -1.459949000 | -5.172275000 | 0.467828000  |
| H | -1.445500000 | 5.138499000  | 0.518043000  |
| H | -1.714196000 | -7.599122000 | 0.119256000  |
| H | -1.692291000 | 7.572574000  | 0.217943000  |
| H | -3.178831000 | -3.913867000 | -1.709759000 |
| H | -3.163740000 | 3.926718000  | -1.687992000 |
| H | -4.604952000 | 1.682388000  | -1.723323000 |
| H | -4.610630000 | -1.663535000 | -1.733340000 |
